# Supplementary material
Source: PubMed Central journal article supplement (PMC2695074)
Supplement: 0901860106_0901860106SI.pdf [file 0901860106_0901860106SI.pdf]

# Supporting Information

Fujii and Toriyama 10.1073/pnas.0901860106

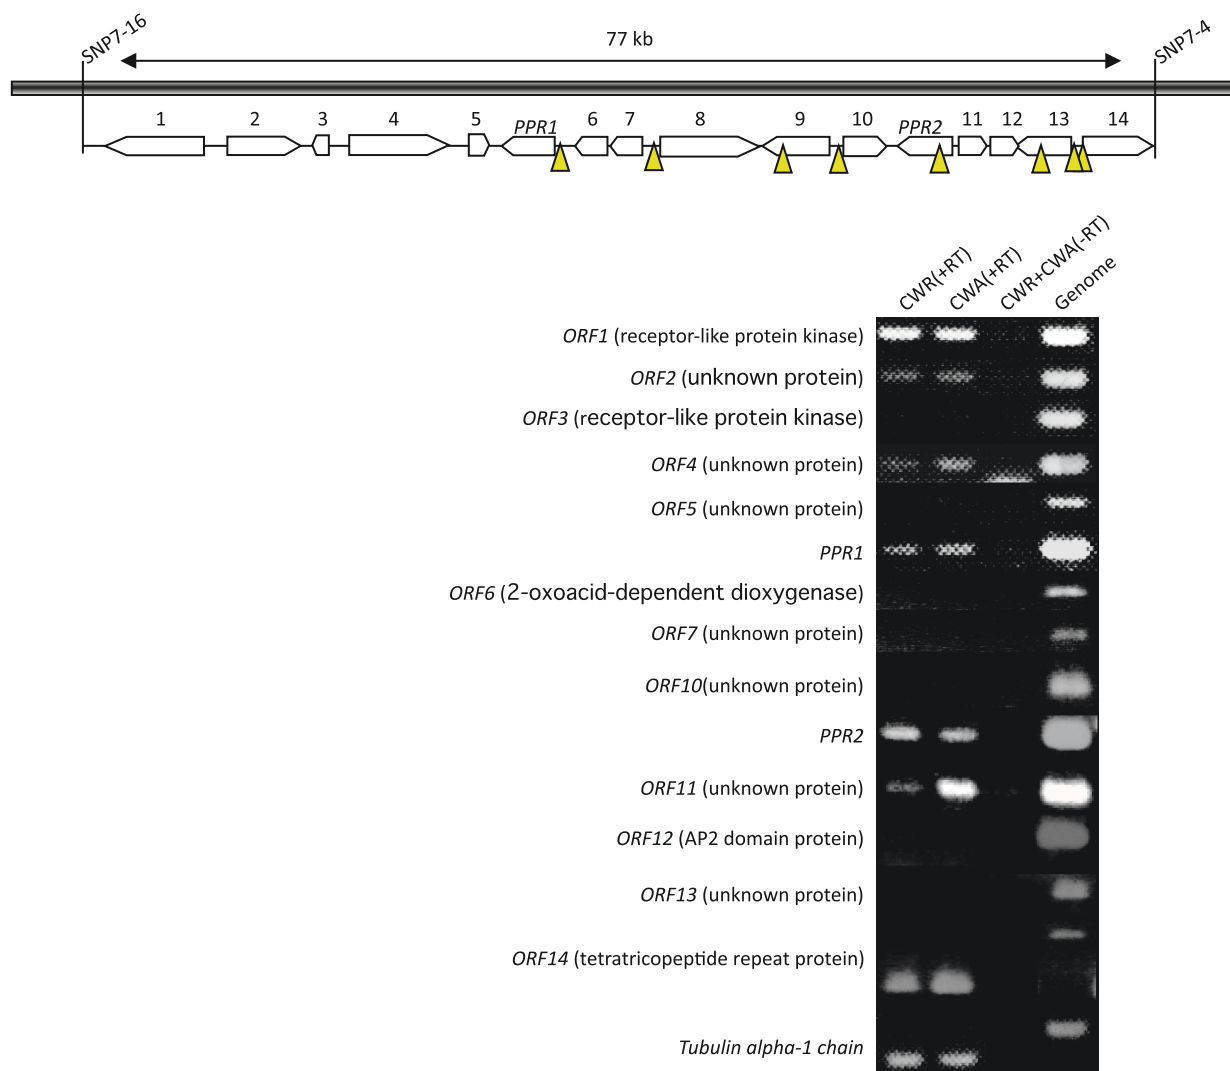

Fig. S1. Transcript detection of 14 predicted genes around the *RF17* locus.

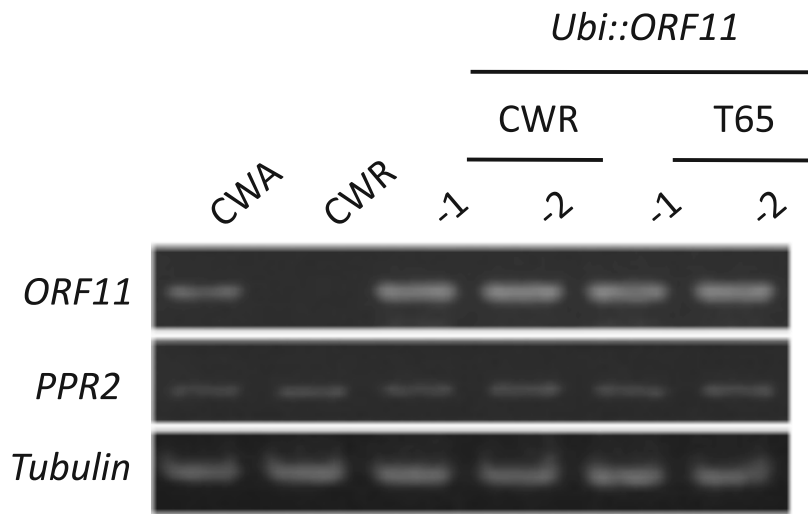

Fig. S2. Overexpression of *ORF11* in mature anthers confirmed by RT-PCR.

|                        | 140     | 150          |
|------------------------|---------|--------------|
| FAS2_YEAST/1769-1832   | AKEAVF  | KSLGVKSLGGGA |
| FAS2_CANAL/1768-1831   | AKEAVF  | KALGVESKGAGA |
| ACPS_BRAJA/5-76        | AKEACSK | ALGTGIRRGVW  |
| ACPS_BACSU/5-73        | AKEAFSK | AFGTGIGRQLS  |
| ACPS_CHLPN/6-73        | GKEAVAK | ALGTGIGSVVA  |
| ACPS_BORBU/4-70        | AKESLIK | ALSPLLQYKIN  |
| ACPS_MYCTU/6-73        | AKEAVIK | AWSGSRFAQRP  |
| P78615_EMENI/1743-1806 | AKEAVF  | KSLGVCSKGAGA |
| PSF1_BACPU/107-169     | MKEAFIK | LTCKGIS-YGL  |
| O64506_ARATH/471-538   | LKEAYVK | ALGKGFSGAPF  |
| GSP_ANEMI/103-165      | IKESYIK | AKGKMY-IP    |
| STCJ_EMENI/1429-1495   | AKEAVFK | CLQTVSKGAGA  |
| Q9ZB56_PROMI/118-182   | LKEAYIK | SRGIGLSEEL   |
| O31302_CORAM/10-89     | AKEAFIK | AWSQAIYQKPP  |
| FAS2_PENPA/1740-1803   | AKEAVF  | KSLGVSSKGAGA |
| Q9FOY4_XANAL/160-226   | AKESLFA | AYSAVGRYFD   |
| LYS5_YEAST/133-197     | LKESYTK | FTGTGLNTDLS  |
| Y495_SYNY3/107-171     | AKEAFL  | KATGKISGGLN  |
| O33901_9GAMM/81-145    | LKESYIK | AKGLGLALS    |
| LP14_BACSU/104-166     | MKESFI  | KQAGKGLS-LPL |
| ACPS_RICPR/5-74        | AKEAVSK | AFVGI GRGIN  |
| ACPS_ECOLI/6-73        | VKEAAKA | FCTGIRNGLA   |
| PPT2_YEAST/15-100      | LKECSL  | KALCCCVSKHDL |
| YDF2_SCHPO/123-188     | CKEAIL  | KALGIGLSGNPL |
| ACPS_STAA8/5-74        | TKEAFS  | KALGTGLGKHVA |
| Q22171_CAEEL/119-190   | LKEAIL  | KATGVGIMKDLN |
| ORF11/139-154          | AAEAALK | SLGTERMRDVG  |

Fig. S3. Alignment of C-terminal amino acids of the ACPS catalytic domain. Amino acids 139-156 of ORF11 are shown.

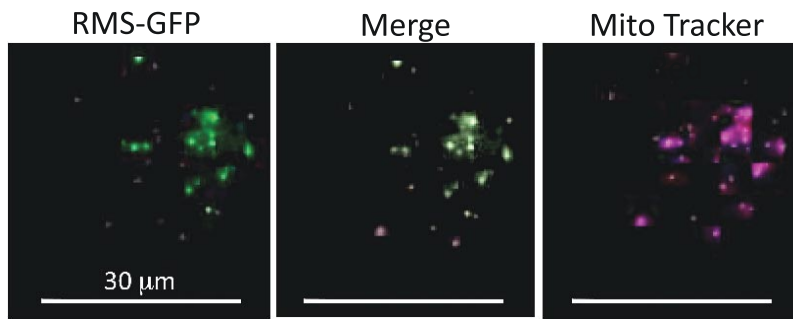

**Fig. S4.** Mitochondrial localization of *ORF11* (= RMS) indicated by the merged image of RMS-GFP and the Mito tracker Red fluorescence.

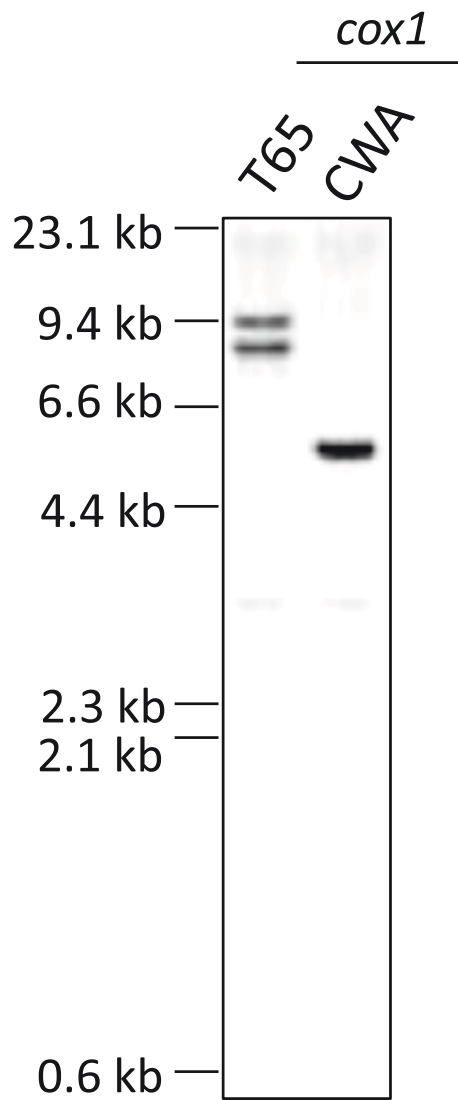

**Fig. S5.** Southern blot analysis of mitochondrial *cox1*. Total DNA isolated from T65 and CWA was digested with *S*all and hybridized with a digoxigenin-labeled *cox1*.



**Table S1. Pollen germination frequency on stigmas after anthesis**

| Line         | No. of stigmas observed ( <i>n</i> ) | No. of stigmas with pollen germination ( <i>a</i> ) | Frequency of stigmas with pollen germination ( <i>a/n</i> ), % | No. of pollen per stigma ( <i>b</i> ) | No. of germinating pollen per stigma ( <i>c</i> ) | Frequency of pollen germination ( <i>c/b</i> ) $\pm$ SD, % |
|--------------|--------------------------------------|-----------------------------------------------------|----------------------------------------------------------------|---------------------------------------|---------------------------------------------------|------------------------------------------------------------|
| CWR          | 7                                    | 7                                                   | 100.00                                                         | 152.6                                 | 118.1                                             | 77 $\pm$ 11                                                |
| CWA          | 7                                    | 0                                                   | 0.00                                                           | 0.4                                   | 0                                                 | 0 $\pm$ 0                                                  |
| T65          | 7                                    | 7                                                   | 100.00                                                         | 151                                   | 121.7                                             | 81 $\pm$ 10                                                |
| RNAi-ORF11-2 | 18                                   | 4                                                   | 22.20                                                          | 1.3                                   | 0.4                                               | 31 $\pm$ 2                                                 |
| RNAi-ORF11-3 | 23                                   | 6                                                   | 26.00                                                          | 1.7                                   | 0.5                                               | 29 $\pm$ 28                                                |
| RNAi-PPR2-1  | 12                                   | 0                                                   | 0.00                                                           | 0.7                                   | 0                                                 | 0 $\pm$ 0                                                  |
| RNAi-PPR2-3  | 16                                   | 0                                                   | 0.00                                                           | 0.4                                   | 0                                                 | 0 $\pm$ 0                                                  |

Table S2. Primer sequences of PCR markers used in this study

| Marker name                                                         | Forward primer sequence | Reverse primer sequence | Chromosome | Position, cM | Polymorphism detection | BAC clone accession no. in NCBI |
|---------------------------------------------------------------------|-------------------------|-------------------------|------------|--------------|------------------------|---------------------------------|
| Markers used for marker-assisted selection of the CMS lines and CWR |                         |                         |            |              |                        |                                 |
| RM3252                                                              | GGTAACTTTGTTCCCATGCC    | GGTCAATCATGCATGCAAGC    | 1          | 0.3          |                        |                                 |
| RM8068                                                              | AAACCTCTCGTGTAAATTAG    | TGAACATTTATTGATATGGTA   | 1          | 9.5          |                        |                                 |
| RM1167                                                              | GAACATAAACCATGCGGGAG    | AGCTAGTGGCAAAAGTGTGC    | 1          | 22.6         |                        |                                 |
| RM8146                                                              | GACTCCTCCAAGTGCAACG     | GTAGCTTCCCCACAATGTCA    | 1          | 25.4         |                        |                                 |
| RM6466                                                              | CGAACGAGAATCCCTCATG     | ATTGCACCAAGAGGAGATCG    | 1          | 49.0         |                        |                                 |
| RM1287                                                              | GGAAGCATGCAATAGCC       | GGCCGTAGTTTTGCTACTGC    | 1          | 58.1         |                        |                                 |
| RM8003                                                              | ATCATGTTAATTAATGTCTAG   | TGCTAAAAGGTTATTTTTAC    | 1          | 73.7         |                        |                                 |
| RM8144                                                              | AAAAGTAGCTATATTTGGGA    | GTGAGGAAATTATCGAAACAG   | 1          | 95.7         |                        |                                 |
| RM3475                                                              | GTCGTTTTGCCTAGTTGAGC    | TTCTCGGTGTATGGGTCTC     | 1          | 107.6        |                        |                                 |
| RM8097                                                              | TACATACACGTTTATGTGCC    | CGAGCGTAGGAAGACTACC     | 1          | 129.0        |                        |                                 |
| RM1216                                                              | TTCCCAATGGAACAGTGAC     | AGGGTCTACCACCGATCTC     | 1          | 132.1        |                        |                                 |
| RM8085                                                              | TGCGTTTGCATTTCTTTTA     | GGAAAGTTGTGTTCTTTGGC    | 1          | 139.9        |                        |                                 |
| RM8062                                                              | CAAATTAATCCATCCATTATT   | GAGGAGATGCTAGTTAATTAC   | 1          | 155.2        |                        |                                 |
| RM6321                                                              | GGCTCTACCTCGCTGTTGTC    | ACGAATATAACCTGCGGCAG    | 1          | 181.8        |                        |                                 |
| RM8136                                                              | ATGTAAGCTAGGTAGAGCTG    | GCGTACGTACGTAAGTAATA    | 1          | 181.8        |                        |                                 |
| RM3340                                                              | TCTTGGCAAGCTCTCTCTC     | CCATCATCTCGATCTTGACG    | 2          | 0.0          |                        |                                 |
| RM7033                                                              | GTGCCAACACTGCACTAAC     | GTTGGCGGTGATTCTGATG     | 2          | 7.9          |                        |                                 |
| RM4355                                                              | GGGTAGAGAGTAGAAGGCA     | TATATGGCAAGCCTAGCG      | 2          | 19.0         |                        |                                 |
| RM6911                                                              | GGTGATTGCTATTTAACTTC    | ACTTTTTCCAAATTATGCT     | 2          | 42.1         |                        |                                 |
| RM6023                                                              | AAGGAAGCAGCGATGTGAAG    | GAGCTAGAGATCACCTGGCG    | 2          | 81.7         |                        |                                 |
| RM3515                                                              | GGAAAGAAGATATGCCATGC    | AGAGAGAATCAGAAACACCAA   | 2          | 95.2         |                        |                                 |
| RM1367                                                              | CGTAGGATCGGAGTTGTTGC    | CCTAGCTGCTACCACCAAGC    | 2          | 110.9        |                        |                                 |
| RM5631                                                              | CGTCCAAGAAATATTGCAGT    | GTGAGACAGAATCCTTACGC    | 2          | 118.1        |                        |                                 |
| RM5303                                                              | GCCATTTCTGCTCTTTCTTA    | GTTTGCATGGAGAAGAAGAA    | 2          | 126.4        |                        |                                 |
| RM3789                                                              | ATTAAGGGCAGGGGCATATC    | CATTGACTGGTGTGGTCAGG    | 2          | 150.5        |                        |                                 |
| RM3850                                                              | AAGTTGAGAATGAGGGACAA    | TTCGGAAGTAAAAGGTAAT     | 2          | 156.3        |                        |                                 |
| RM3248                                                              | AGAAGGTTGCTTTCTTGGCC    | CTTGCAAGGTCTGTTGCATC    | 2          | 157.9        |                        |                                 |
| RM4108                                                              | GTCCCTCGCTTATATCTAG     | CAACTCTGCTAAACGAATTA    | 3          | 1.1          |                        |                                 |
| RM6297                                                              | TTCTTCTCTCTCTCGCTCG     | CCAAAGCAACCCATCTCAAC    | 3          | 7.9          |                        |                                 |
| RM1338                                                              | AGAGGGAATTAGATTGGATT    | GGTCCACTTCTTCTTCTAT     | 3          | 40.3         |                        |                                 |
| RM6676                                                              | GTTACGGTCCAATAAGAAAT    | CTTCAAGCTTACGAAAACA     | 3          | 65.4         |                        |                                 |
| RM3223                                                              | CCGACGCTCAAGATCGTC      | GAGAGAGAGGAGGGGAGAGG    | 3          | 86.0         |                        |                                 |
| RM6146                                                              | ATCTTCTCCGGTCTCCCTC     | AAGGAGGGAGGAGGCGTAG     | 3          | 86.0         |                        |                                 |
| RM5626                                                              | ATCAGTCGGTCATAAAGCC     | ACCTTCTTCTGCTGCTG       | 3          | 99.0         |                        |                                 |
| RM2334                                                              | CATGCATCTGATCTGATTAT    | TGTGAAGAGTACAAGTAGGG    | 3          | 115.6        |                        |                                 |
| RM3856                                                              | TTGCATAACAAGATGAACAA    | TTAATTGCGGATTTTTTATT    | 3          | 127.4        |                        |                                 |
| RM6759                                                              | TGGAAAATTTGATGACATA     | TATGGGGTATCCATAATCTC    | 3          | 144.5        |                        |                                 |
| RM7389                                                              | AGCGACGGATGCATGATC      | TTGAGCCGGAGGTAGTCTTG    | 3          | 164.4        |                        |                                 |
| RM3585                                                              | TTGATGAGAGTGAACCAGCG    | CGTTTATGCAGAACAACCCC    | 3          | 164.4        |                        |                                 |
| RM3586                                                              | GAAGAGAGAGCCAGAGCCAG    | ACACGATCGAGCTAGAAGACG   | 3          | 164.4        |                        |                                 |
| RM7535                                                              | GACGAAAACCGGTCGAATTC    | TCCAACAAGAGTGAGCATGC    | 4          | 6.8          |                        |                                 |
| RM1359                                                              | AACGAATTCTATTTTGCCTC    | TTCTTCTCATTTCAATTCGC    | 4          | 56.1         |                        |                                 |
| RM3558                                                              | ACGAGAGATCTTCTTTCGAC    | CCTCTATTTATGCCTCTACGC   | 4          | 69.8         |                        |                                 |
| RM3866                                                              | AGTTGGTCATCTACCAGAGC    | GATCTTCTGCTCAGAAAG      | 4          | 70.9         |                        |                                 |
| RM3276                                                              | TCCGTCTCGACTCTCCATC     | GATGAGACACCACGGACATG    | 4          | 102.4        |                        |                                 |
| RM3335                                                              | TAATCCACTGTGTCATTTAA    | ACCATCATCTTGTACCTAGT    | 4          | 113.2        |                        |                                 |
| RM5879                                                              | ACCAGAGATCGATTGGTAGC    | GGCTGCCTATCGAGGCTAAC    | 4          | 129.6        |                        |                                 |
| RM1248                                                              | ACAAGCAGCTAATGGTTGGG    | GTGATTTTGGCTCAGGTGAG    | 5          | 3.0          |                        |                                 |
| RM7373                                                              | AACTCCTCCTTCTTCTGTC     | ACAGGTTGATCGATCTTGCC    | 5          | 3.0          |                        |                                 |
| RM5874                                                              | GAAAAGATCCTGCTCGTTG     | GATCATCGCCAGAGCTC       | 5          | 30.7         |                        |                                 |
| RM3777                                                              | GCTCCCAAATCTTGGTCTTG    | TCTCACCTCTTCCCTACAAGC   | 5          | 31.5         |                        |                                 |
| RM3853                                                              | AACATATGCTATGTGCCCTT    | GGAGTTATCAGCAAATGCTC    | 5          | 31.5         |                        |                                 |
| RM3322                                                              | CTTCTCCACCCATGCCAC      | CCTGCAACGAACACCCAC      | 5          | 32.0         |                        |                                 |
| RM3419                                                              | ATCTTGGTGAACAGTGCTC     | CTGCTGCTATTCCTCAAGAC    | 5          | 36.4         |                        |                                 |
| RM3437                                                              | AACCACCTAGGTTTCTCCCC    | TAGCAACGAGGTTATTGGGC    | 5          | 60.7         |                        |                                 |
| RM3800                                                              | GAATGAACCAATCCAAATGA    | CCTGGAAGTGTGTATGATC     | 5          | 87.4         |                        |                                 |
| RM4501                                                              | GCACAAATGTCTCTGTCTAA    | AGAGTACGAAACGGTACAAG    | 5          | 89.6         |                        |                                 |
| RM1054                                                              | ACTTACATCTGAGGTGCATA    | GCATTGCAGATTACAGATAC    | 5          | 122.0        |                        |                                 |
| RM8109                                                              | CATTGTTTAAAGTGCATAATTG  | ACCATGACATGGCACATT      | 6          | 1.7          |                        |                                 |
| RM2615                                                              | CAGAGTGCTTTAGACAATCA    | AAATTGTAAGAGATTCTGC     | 6          | 32.7         |                        |                                 |
| RM6857                                                              | ATGTTTTCTTTTTTGGAGG     | AGAGGAAAAGATGAGGGGAA    | 6          | 34.3         |                        |                                 |



| Marker name | Forward primer sequence    | Reverse primer sequence  | Chromosome | Position, cM | Polymorphism detection | BAC clone accession no. in NCBI |
|-------------|----------------------------|--------------------------|------------|--------------|------------------------|---------------------------------|
| RM6836      | TTGTTGTATACCTCATCGAC       | AGGGTAAGACGTTTAACTTG     | 6          | 54.1         |                        |                                 |
| RM5745      | ATGCCAAGTGGACGATGTAC       | ACATGTGGGTAGTGGGATGG     | 6          | 64.9         |                        |                                 |
| RM6818      | GTCGCATTCGTCTCCACC         | ACCATTTCCAGATGACTCGG     | 6          | 65.8         |                        |                                 |
| RM1161      | AAACTGTTTTACCCCTGGCC       | ATCCCCTTCTGCGGTAACAAC    | 6          | 65.8         |                        |                                 |
| RM2229      | AGCACCTAAGCATCTAGCAC       | CATGTACCCAAAACAATTA      | 6          | 65.8         |                        |                                 |
| RM5087      | AAGGAGTTAGTGGGGGATAA       | GAGATGAGATCCGAACCTCT     | 6          | 65.8         |                        |                                 |
| RM3827      | TAGTCTCGAGGACGGATTG        | CTGGCCTTTCTTCAATCTGC     | 6          | 80.4         |                        |                                 |
| RM5314      | ATCCCACAATAACCCCTTGC       | TGGTTGAGAGGTTGGATGG      | 6          | 91.9         |                        |                                 |
| RM5753      | AACATGCTCAACTTCTGGGC       | GCTAGGTACGATCCAGCTGC     | 6          | 124.4        |                        |                                 |
| RM508       | AGAAGCCGGTTCATAGTTCATGC    | ACCCGTGAACCACAAAGAACG    | 6          | <8.2         |                        |                                 |
| RM7083      | AACTCAGGCACAGCCAAACAGC     | CCACCTCTACTGTACGGTCTCG   | 6          | <8.2         |                        |                                 |
| RM19262     | GGAAAGACCAGTTTAGAGCAATGG   | AGCTAGATCCCTGTGTTTACACG  | 6          | <8.2         |                        |                                 |
| RM8059      | CTTGATGCATCCACGGTACG       | AACCAACGAACCAACGGAAAGC   | 6          | <8.2         |                        |                                 |
| RM8060      | GGTTGTGCTGAATACTGTCCATAAGC | CAGGTAACCGGTGAAGATGTGC   | 6          | <8.2         |                        |                                 |
| RM3132      | TTTGAGGAGAGTCTTGGGTTTGG    | CTCCACTTCTCTTCACTCCCTTCC | 6          | <8.2         |                        |                                 |
| RM4784      | TACTGCAGAATTCCTGTGAGACG    | GTACAAATTCCTGTTCTGAGAGC  | 6          | <8.2         |                        |                                 |
| RM7399      | CAGATATGATGTTCTTGCCCTTGC   | GCTTGCCAGATCACCTACCTACC  | 6          | <8.2         |                        |                                 |
| RM2353      | CCTGGAGCAACTGTGGTACAAGC    | AGCCACACTTGTGGTAGGTTTGG  | 6          | <8.2         |                        |                                 |
| RM6663      | CCTCATCGGTGCGAACAC         | ATACAGTGAAGCGTGTCCGG     | 7          | 0.0          |                        |                                 |
| RM3196      | ACCATGTCAGCAACCAC          | ACATGTCTGATCGAGCTTCC     | 7          | 0.0          |                        |                                 |
| RM1093      | AGGTTGATGAACCCGATGAG       | CTAGCTGCAGAACGGAGGAG     | 7          | 2.5          |                        |                                 |
| RM3394      | CCCTTACGTGCAGTACATTG       | ATGCAGGCTACTTACTAGCG     | 7          | 2.5          |                        |                                 |
| RM8263      | TTTGCTGTCCCTTGTTC          | TGCAATTCAAAGTCTTAGGG     | 7          | 35.7         |                        |                                 |
| RM6872      | GGATGAACACTGATGATGGC       | ACCTCCACCAGATATCCAC      | 7          | 35.7         |                        |                                 |
| RM6728      | GGGTATGTGTCTGCTATTTTA      | GAAATCTGGAATTTCCCTA      | 7          | 42.6         |                        |                                 |
| RM6767      | ACATTCTTGATCTACGTGGC       | AATTATGGTTGCTAGGTTGG     | 7          | 60.8         |                        |                                 |
| RM1973      | GAGTTGGAAGGATATTTAA        | TGGAGCCTAGAGAATACATA     | 7          | 71.3         |                        |                                 |
| RM1330      | CAGAGCTGTGGAAGAGGAG        | CTCCTCAAACCGACTTC        | 7          | 96.1         |                        |                                 |
| RM1364      | AAGAAATCAAACACATGA         | AAAACATCTACTTTGATCCA     | 7          | 101.8        |                        |                                 |
| RM5720      | CCTGATAAATTGACAGTTAC       | GAGAGTAGGAGTTGATAACA     | 7          | 115.5        |                        |                                 |
| RM1306      | TGCCAATTACCTTCCCCTAC       | TGCTCCGATTGCTGCTATG      | 7          | 116.1        |                        |                                 |
| RM5911      | CCCTTTTTAAGTCTGGGG         | GGTGCCTCCTTCAAAGTTG      | 8          | 0.0          |                        |                                 |
| RM6369      | CAAGCTAGGGCTGCATAAGC       | GCTTACCTACTACTCTCAC      | 8          | 0.5          |                        |                                 |
| RM1235      | GAAAACTAAAAAGCAGAGGA       | AAGCTATCCATTTTGGATTA     | 8          | 12.8         |                        |                                 |
| RM3572      | AGTGCTGTCTGTTTTTGGC        | CCCCTCCCTTCTTCTTTG       | 8          | 32.7         |                        |                                 |
| RM4085      | ACGAACTACTCATGTGTAA        | CGAGTCTAGAATCCATATAA     | 8          | 35.7         |                        |                                 |
| RM6215      | CAGCAGAGAGATGACGCAAG       | AAACCCAAAACCCCTCGTCTC    | 8          | 66.5         |                        |                                 |
| RM5485      | CTTCCACAAGCTTGGCTAGG       | AATGCCATCCCCTACTCATG     | 8          | 96.6         |                        |                                 |
| RM8058      | ATATGATTTTCTCAAACAAC       | CCAAACTACTAAACAGTACA     | 8          | 99.1         |                        |                                 |
| RM3120      | ATCGATGGAAGCTTTTGC         | GGATGTACAAGAGCTTAGGAG    | 8          | 127.2        |                        |                                 |
| RM3496      | CGCTGAAAATACTGAATTGA       | AGATGCATTTATTCCGAAAG     | 8          | 127.2        |                        |                                 |
| RM3840      | GAGGAAGAGGAAGGGACTCACC     | TTGCGTCTACTGCTACTTCTCC   | 8          | 127.2        |                        |                                 |
| RM7400      | TGCAGCAGAAACACGAAGAG       | AACTCGCCATCATCTCCAAG     | 8          | 127.2        |                        |                                 |
| RM1328      | GAATGGGATTAGACGATTTG       | CCATGAGTGACATCAAAGG      | 9          | 0.0          |                        |                                 |
| RM8206      | TCTTTCTGGATCATTGGATG       | ACTCTGCCAAGGATAACAAG     | 9          | 3.2          |                        |                                 |
| RM6475      | AGATCAAAGCAACGGCTAGC       | GAACAGAGAGGGGACGTGTC     | 9          | 42.5         |                        |                                 |
| RM5657      | TATGTGCATTTGTAAGGTGA       | GCTTTAGATTATTGAGCGAG     | 9          | 49.3         |                        |                                 |
| RM1189      | AACTGCCCATTTGTCTGTC        | GACTCCGGACTAGACCAATC     | 9          | 58.3         |                        |                                 |
| RM7424      | AGAAGCCCATCTAGCAGCAG       | TCAAGCTAGCCACACAGCTG     | 9          | 60.8         |                        |                                 |
| RM5786      | AAATCAGGAAAGTTTCTCAGC      | AGAGACACAGGCAAGTCATC     | 9          | 77.2         |                        |                                 |
| RM2144      | ACATTATGAAACGGAGGAAG       | GAAATGATGCATCAGCATTA     | 9          | 91.5         |                        |                                 |
| RM6364      | GTTCAATTCGTCTTCTCGG        | TCTGATTCTTCTTCTCCG       | 10         | 0.0          |                        |                                 |
| RM3311      | AAGTATCCCTGTCTCACGCC       | AGGTAGAGGGAGGGAGGGAG     | 10         | 19.0         |                        |                                 |
| RM6704      | CACACATTGCATTACGAGGG       | CAGGGGCAGCTTGAATACTG     | 10         | 48.1         |                        |                                 |
| RM1873      | CTGACAGGACATTAATAAAC       | CCTCATCTTAATCTCTTTA      | 10         | 48.4         |                        |                                 |
| RM5352      | CATGGTGCAAGTATGGATC        | GTCTCTGCTGCAACACATCG     | 10         | 71.4         |                        |                                 |
| RM3451      | CGGCGAGATAACAATTCTCC       | GCGTGATGATATGGTATCGG     | 10         | 72.8         |                        |                                 |
| RM4771      | ACGTTGATTTCAATCAGGTC       | ACGCTAACTGAGAAACATGG     | 10         | 83.8         |                        |                                 |
| RM5768      | TTAGAGATGGGCCTAGCAGC       | CACCCCTCATCACCATGACAC    | 10         | 94.1         |                        |                                 |
| RM1761      | ACGCTTAAAGAACATTTGAT       | GCGATTAACCTTTAACCATT     | 11         | 0.3          |                        |                                 |
| RM7557      | GTGTACTGCCATGAAAGGCC       | GAAGTGCCTTTGAGGAGAG      | 11         | 9.2          |                        |                                 |
| RM1812      | CAGCTAGTGAGCTCCTAGTG       | GCTAACCCACCACTTATTC      | 11         | 10.3         |                        |                                 |
| RM5599      | CTCACAAATACCCATCCAC        | AATTTTGTGCTGTTGTGAA      | 11         | 19.8         |                        |                                 |

| Marker name                                             | Forward primer sequence | Reverse primer sequence  | Chromosome | Position, cM | Polymorphism detection    | BAC clone accession no. in NCBI |
|---------------------------------------------------------|-------------------------|--------------------------|------------|--------------|---------------------------|---------------------------------|
| RM3625                                                  | CTTGCAATTCAATTGCTTAC    | GGTGGCCTAGTAAAATAAA      | 11         | 34.8         |                           |                                 |
| RM3428                                                  | ATTCATGCTTCCTTTCAGTG    | GATTAAGTGGTTTGCCATTTG    | 11         | 56.2         |                           |                                 |
| RM6091                                                  | GCTGTCCTGCTTGAATCC      | TGGTAGGCTGGTGACATGC      | 11         | 56.2         |                           |                                 |
| RM5349                                                  | AGGGCATGCTTACATCCAAC    | CATTTGCTTCTATGCCCCAG     | 11         | 79.1         |                           |                                 |
| RM5961                                                  | GTATGCTCCTCCTCACCTGC    | ACATGCGACGTGATGTGAAC     | 11         | 79.9         |                           |                                 |
| RM4069                                                  | ACAATAATCTTCAAAGATGC    | AATCATTGTGAAGTCAATC      | 11         | 112.1        |                           |                                 |
| RM1233                                                  | GTGTAATCATGGGCACGTG     | AGATTGGCTCCTGAAGAAGG     | 11         | 112.9        |                           |                                 |
| RM7240                                                  | GCGACGACGAAGCTACCTAC    | ACGTTTCGGGTTTCATGCC      | 11         | 112.9        |                           |                                 |
| RM5926                                                  | ATATACTGTAGGTCCATCCA    | AGATAGTATAGCGTAGCAGC     | 11         | 117.9        |                           |                                 |
| RM1880                                                  | ACCACTAAATAAGCACATAC    | GGCATCATACATTAATAATAC    | 12         | 9.4          |                           |                                 |
| RM3483                                                  | CCTAGCTTTCAGGAGCAAG     | CCCACAATGAGAAAACAGTTG    | 12         | 10.0         |                           |                                 |
| RM8214                                                  | CCTAGCTTTCAGGAGCAAG     | CCCACAATGAGAAAACAGTTG    | 12         | 10.0         |                           |                                 |
| RM3472                                                  | ATCGCAAGAATCCGTGAAG     | CGCTTTTGAGCTCGCCTC       | 12         | 27.6         |                           |                                 |
| RM3455                                                  | TGAATCCACACTCGCAGATC    | GCCAGTCCACGATTGGTC       | 12         | 38.1         |                           |                                 |
| RM7619                                                  | CTTGGTATGTATTGGCAGCG    | GAGGCAATAGGAGGGGAGAG     | 12         | 38.1         |                           |                                 |
| RM5746                                                  | TCGCTACGTCGACTGATTTG    | ATATCATCAGTCGGCAGCAG     | 12         | 39.4         |                           |                                 |
| RM7003                                                  | GGCAGACATACAGCTTATAGGC  | TGCAAATGAACCCCTCTAGC     | 12         | 41.8         |                           |                                 |
| RM6973                                                  | CAACTCCAGCTTCGCCAAC     | CGGCCACACCTAAATAAACG     | 12         | 49.3         |                           |                                 |
| RM1337                                                  | GCTGAGGAGTATCCTTTCTC    | ACCATAGGAAGATCATCACA     | 12         | 51.5         |                           |                                 |
| RM1261                                                  | GTCCATGCCCAAGACACAAC    | GTTACATCATGGGTGACCCC     | 12         | 61.6         |                           |                                 |
| RM1246                                                  | AGCTCGATCCCCTAGCTCTC    | TTGGAGAAGGTCACTGCC       | 12         | 65.3         |                           |                                 |
| RM7102                                                  | CGGCTTGAGAGCGTTTTTAG    | TACTTGGTTACTCGGGTCGG     | 12         | 71.9         |                           |                                 |
| RM6869                                                  | GAGCTCCTGTAGTGACCCG     | ATCAGCCTCGCAGCTTC        | 12         | 75.8         |                           |                                 |
| RM3331                                                  | CCTCCTCATGAGCTAATGC     | AGGAGGAGCGGATTTCTCTC     | 12         | 89.5         |                           |                                 |
| RM7376                                                  | TCACCGTCACTCTTAAGTC     | GGTGGTTGTGTCTGTTTGG      | 12         | 89.5         |                           |                                 |
| RM1103                                                  | CAGCTGTGCTACTACCCG      | CTACTCCACGTCCATGCATG     | 12         | 91.4         |                           |                                 |
| RM5609                                                  | CGCCAGTGTGCAATATGATG    | TCTTGGTGCAGTAGGTGCAC     | 12         | 93.0         |                           |                                 |
| RM6947                                                  | ATTAACGTCCTACTGCTGGC    | GCTAGGTTAGTGGTGCAGGG     | 12         | 93.0         |                           |                                 |
| RM5479                                                  | TGATGCCTCCTAAGCTCACC    | ACTTCTCCCCTCTCTGCTCC     | 12         | 95.4         |                           |                                 |
| RM1264                                                  | CGGATAAGGACAAAGCAAGC    | GTAGTACTGTGGACCAACCCG    | 12         | 104.2        |                           |                                 |
| RM6953                                                  | ATGTCTCAACGGACGTAGGC    | CTTGATGCAAGAACTGCTGC     | 12         | 104.2        |                           |                                 |
| RM2197                                                  | ACTGAGAACTTAAATCATCG    | GAACAACCTTGAAGAGAAAAC    | 12         | 109.2        |                           |                                 |
| Markers used for high-resolution mapping of <i>Rf17</i> |                         |                          |            |              |                           |                                 |
| AT4-1                                                   | ACTGAAGCAAGTGACGTACG    | CACCACTAGTCCACTAGTTC     |            |              | PCR                       | AL606588                        |
| SNP7-21                                                 | GGAAGAAGTGATTCGCTCAAC   | GGGTAGGGTGATTCAGATGC     |            |              | PCR-RFLP( <i>SpeI</i> )   | AL731582                        |
| SNP7-26                                                 | GGTATGTATGATCAGCTGCC    | GATAGTAGGCCCTTTGCTTG     |            |              | PCR-RFLP( <i>MspI</i> )   | AL731582                        |
| SNP7-5                                                  | CGGTGTCTGTTATTATCTCC    | TTATTCCTCTGGAGGGTGCA     |            |              | PCR-RFLP( <i>MseI</i> )   | AL731582                        |
| SNP7-4                                                  | CCACCACTGATGCCAACTAC    | ATGACATGCGAACAGCTCAC     |            |              | PCR-RFLP( <i>HhaI</i> )   | AL731582                        |
| INDEL7-1                                                | AACTCCACATGCATGCCATC    | CTGTACTCGCTTTGAGATGC     |            |              | PCR                       | AL731582                        |
| INDEL7-18                                               | GTCATTCTCCGTAACAAGCG    | TCCATTGGAACACTCCCTC      |            |              | PCR                       | AL731582                        |
| INDEL7-2                                                | ATTTGCGGGCTCATAATGGG    | AGAAAGCCCCGACACTCCATT    |            |              | PCR                       | AL731582                        |
| SNP7-14                                                 | CGGCTACGAATTTTCAGTAGC   | ATCTCGTCGAAAACAAGCC      |            |              | PCR                       | AL731582                        |
| SNP7-16                                                 | GAGCCAACTGCAACGAGTTC    | GTGGTACCATCCTAGTATCC     |            |              | PCR                       | AL731582                        |
| SNP7-17                                                 | ACGTCCCCATTGCTTTTGTG    | TTGATCGTGGCGATTGATGG     |            |              | PCR                       | AL731582                        |
| S13322*                                                 | TGGTGCGACGACATTCCTGAGAT | AGGGTCTGTCGGGTGTTAGATTGC |            |              | PCR-RFLP( <i>HaeIII</i> ) | AL606595                        |
| INDEL8-1                                                | ACAGAGACCAATTTCCCTC     | TGCTCGATGTCGAAGTCGCC     |            |              | PCR                       | AL606595                        |
| INDEL8-2                                                | GTGGGTTGTCTTCTACTG      | GTTTCTGTGCTAGGAATGCC     |            |              | PCR                       | AL606595                        |
| RM3839 (1)                                              | AATGGGACCAGAAAGCACAC    | AAAAAGAGCATGGGGGCTAC     |            |              | PCR                       | AL606595                        |
| SNP8-4                                                  | AGGTGTACAGGCTTGAATGC    | AGAGCACGTAGGAGAGGATG     |            |              | PCR                       | AL606595                        |
| GT10-1                                                  | GCAGTCAAATCCGATGGTAG    | ATTAGATGCGTCAACTCCACGA   |            |              | PCR                       | AL606623                        |
| TG10.5-1                                                | TGGTAGAAAACCTCAACCCC    | CGAGATCTACTCACTTCTCG     |            |              | PCR                       | AL606623                        |
| INDEL5-2                                                | GAGGCACATGAGCAGATTGA    | ATCAGTAGCCGTGGAACACC     |            |              | PCR-RFLP( <i>MspI</i> )   | AL606441                        |
| INDEL6-1                                                | CATAGCCGGCCAGAACTAAG    | TAGCTAGCGCTGCAGAAGTG     |            |              | PCR-RFLP( <i>HhaI</i> )   | AL606447                        |
| INDEL6-4                                                | TTGGTATGTGCTCGAATCCA    | TGATTGACAGCCAAACAGGA     |            |              | PCR-RFLP( <i>HhaI</i> )   | AL606447                        |

\*See <http://rgp.dna.affrc.go.jp/publicdata/caps/index.html>.

**Table S3. Primer sequences for RT-PCR**

| Gene name          | RAP-DB accession no. | Forward primer sequence   | Reverse primer sequence    |
|--------------------|----------------------|---------------------------|----------------------------|
| <i>ORF11 (RMS)</i> | Os04g0475900         | ACTCGGTTCCAGGCGATGGTGGAA  | GGTGGCTAAACTTGGCCAGCCAAAAC |
| <i>PPR2</i>        | Os04g0475800         | TCGTTACCACGGTAGATAGACTCAT | CCCACATCTTCTCCTTGCATAATCC  |
| Tubulin            | Os07g0574800         | TACAACGGTTGGCGTCGCAC      | AACTGCGCACACGGTCCAG        |
